# Supplementary material for: Incidence of Avoidable 30-Day Readmissions Following Hospitalization for Community-Acquired Pneumonia in France
Source: PubMed Central journal article supplement (PMC8994128; doi:10.1001/jamanetworkopen.2022.6574), 2022-04-08

## Supplemental Online Content

Boussat B, Cazzorla F, Le Marechal M, et al. Incidence of avoidable 30-day readmissions following hospitalization for community-acquired pneumonia in France. *JAMA Netw Open*. 2022;5(4):e226574. doi:10.1001/jamanetworkopen.2022.6574

**eTable 1.** *ICD-10* Codes That Define Pneumonia

**eTable 2.** Description of Scales Used by Physician Reviewers to Rate Readmission Causation and Avoidability

**eFigure.** Distribution of Avoidable Probability

This supplemental material has been provided by the authors to give readers additional information about their work.

**eTable 1. ICD-10 Codes that Define Pneumonia**

| ICD-10                                                                                                                     | Description                                                                              |
|----------------------------------------------------------------------------------------------------------------------------|------------------------------------------------------------------------------------------|
| Primary diagnosis code of pneumonia                                                                                        |                                                                                          |
| B01.2                                                                                                                      | Varicella pneumonia                                                                      |
| B20.6                                                                                                                      | HIV disease resulting in Pneumocystis jirovecii pneumonia                                |
| B25.0                                                                                                                      | Cytomegaloviral pneumonitis                                                              |
| B59                                                                                                                        | Pneumocystosis                                                                           |
| J10.0                                                                                                                      | Influenza with pneumonia, seasonal influenza virus identified                            |
| J11.0                                                                                                                      | Influenza with pneumonia, virus not identified                                           |
| J12.x                                                                                                                      | Viral pneumonia, not elsewhere classified                                                |
| J13                                                                                                                        | Pneumonia due to Streptococcus pneumoniae                                                |
| J14                                                                                                                        | Pneumonia due to Haemophilus influenzae                                                  |
| J15.x                                                                                                                      | Bacterial pneumonia, not elsewhere classified                                            |
| J16.x                                                                                                                      | Pneumonia due to other infectious organisms, not elsewhere classified                    |
| J17.x                                                                                                                      | Pneumonia in diseases classified elsewhere                                               |
| J18.x                                                                                                                      | Pneumonia, organism unspecified                                                          |
| J69.0                                                                                                                      | Pneumonitis due to inhalation of food and vomit                                          |
| Primary diagnosis code of sepsis, respiratory failure, or compatible symptoms with a secondary diagnosis code of pneumonia |                                                                                          |
| A40.x                                                                                                                      | Streptococcal sepsis                                                                     |
| A41.x                                                                                                                      | Other sepsis                                                                             |
| D65                                                                                                                        | Disseminated intravascular coagulation (defibrination syndrome)                          |
| E86.x                                                                                                                      | Volume depletion                                                                         |
| E87.x                                                                                                                      | Other disorders of fluid, electrolyte and acid-base balance                              |
| J80                                                                                                                        | Adult respiratory distress syndrome                                                      |
| J81                                                                                                                        | Pulmonary edema                                                                          |
| J85.1                                                                                                                      | Abscess of lung with pneumonia                                                           |
| J90                                                                                                                        | Pleural effusion, not elsewhere classified                                               |
| J91                                                                                                                        | Pleural effusion in conditions classified elsewhere                                      |
| J96.x                                                                                                                      | Respiratory failure, not elsewhere classified                                            |
| O99.5                                                                                                                      | Diseases of the respiratory system complicating pregnancy, childbirth and the puerperium |
| R04.2                                                                                                                      | Haemoptysis                                                                              |
| R06.0                                                                                                                      | Abnormalities of breathing                                                               |
| R07.1                                                                                                                      | Chest pain on breathing                                                                  |
| R07.2                                                                                                                      | Precordial pain                                                                          |
| R07.3                                                                                                                      | Other chest pain                                                                         |
| R07.4                                                                                                                      | Chest pain, unspecified                                                                  |
| R41.0                                                                                                                      | Disorientation, unspecified                                                              |
| R50.9                                                                                                                      | Fever, unspecified                                                                       |
| R57.1                                                                                                                      | Hypovolaemic shock                                                                       |
| R57.2                                                                                                                      | Septic shock                                                                             |
| R57.9                                                                                                                      | Shock, unspecified                                                                       |

|     |                                                 |
|-----|-------------------------------------------------|
| R91 | Abnormal findings on diagnostic imaging of lung |
|-----|-------------------------------------------------|

**eTable 2. Description of Scales Used by Physician Reviewers to Rate Readmission Causation and Avoidability**

| RATING | CAUSATION                                           | AVOIDABILITY                                  |
|--------|-----------------------------------------------------|-----------------------------------------------|
| 1      | No evidence for management causation                | No evidence for preventability                |
| 2      | Slight evidence for management causation            | Slight evidence for preventability            |
| 3      | Management causation less than 50-50 but close call | Preventability less than 50-50 but close call |
| 4      | Management causation more than 50-50 but close call | Preventability more than 50-50 but close call |
| 5      | Strong evidence for management causation            | Strong evidence for preventability            |
| 6      | Virtually certain evidence for management causation | Virtually certain evidence for preventability |

For each domain, a rating of 4 or more indicated that the reviewer felt that evidence existed for causation or avoidability in that case.

eFigure 1

**Distribution of avoidable probability**

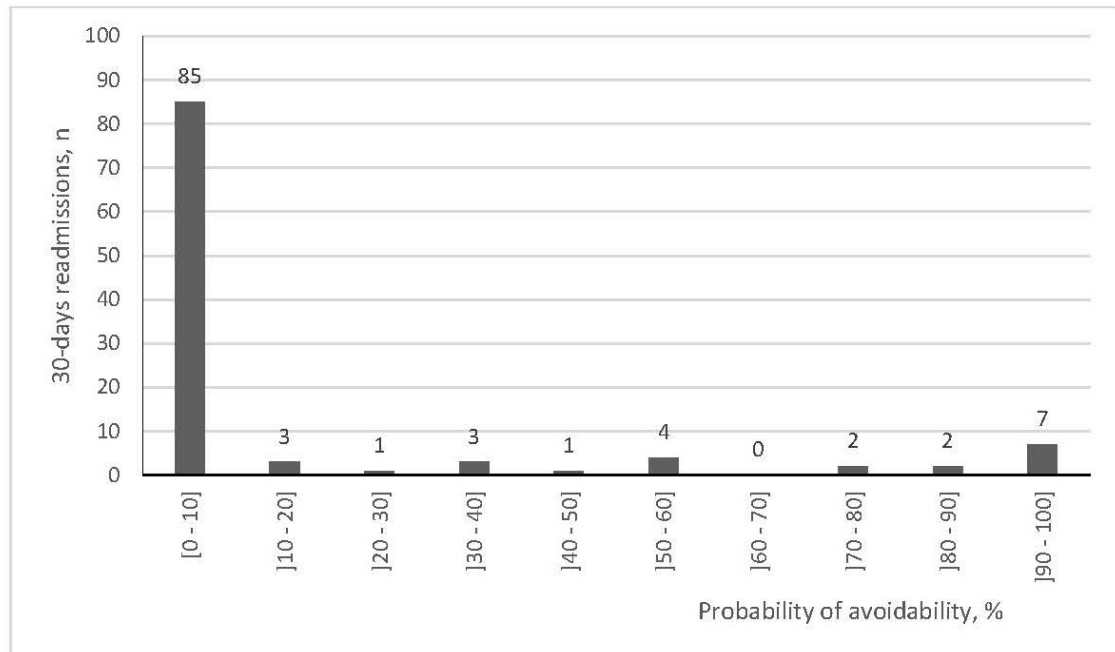

Supplement: jamanetwopen-e226574-s001.pdf [file jamanetwopen-e226574-s001.pdf]
